# Supplementary material for: Impact of Chemical and Fish (Tilapia nilotica) manure Fertilization Methods on Growth, Anatomical Development, Mineral Nutrition, and Grain Quality of Triticum aestivum L. cv. Yecora Rojo
Source: Research Square preprint supplement (doi:10.21203/rs.3.rs-8686731/v1), 2026-02-19
Supplement: Supplementary file 1 [file decda0a7eb00500c4afdcc6b.docx]

**Table S1.** Measured traits abbreviations indicated in Figure 4.

| Traits | Abbreviations | Traits | Abbreviations |
| --- | --- | --- | --- |
| *Morphological and yield components* |  | ***Mineral elements*** |  |
| Plant_height | P_H | N% | N |
| Root_fresh_weight | R_f_w | P% | P |
| Shoot_fresh_weight | Sh_f_w | K% | K |
| Root_length | R_l | Ca% | Ca |
| Length_spikelets | L_s | Mg% | Mg |
| Weight_spikelets | W_s | Fe ppm | Fe |
| Root_dry_weight | R_d_w | Zn ppm | Zn |
| Seedling_dry_weight | Seed_d_w | Mn ppm | Mn |
| Shoot_dry_weight | Sh_d_w | Cu ppm | Cu |
| Yield | Y | Se ppm | Se |
| *Stem anatomy* |  | B ppm | B |
| Stem diameter (µm) | Ste dia | ***Protein*** |  |
| Stem wall thickness (µm) | Ste wall thick | Crude Protein | Prot |
| Diameter of pith cavity (µm) | pith cavity Dia | Fat% | Fat% |
| Number of vascular bundles | Nbr vasc bund | Carbohydrate % | Carbohydrate % |
| Large vascular bundle – length (µm) | Lar vasc bund – length | Gluten % | Gluten % |
| Large vascular bundle – width (µm) | Lar vasc bun – width | ***Essential amino acid*** |  |
| Phloem thickness (µm) | Phlo thick | Valine | Val |
| Metaxylem vessel diameter (µm) | Metaxy vessel dia | Histidine | Hist |
| *Root anatomy* |  | Leucine | Leu |
| Root diameter (µm) | R dia | Threonine | Threo |
| Epidermis thickness (µm) | Epi thick | Isoleucine | Isoleu |
| Cortex thickness (µm) | Cort thick | Phenylalanine | Phenylal |
| Pith thickness (µm) | Pith thick | Methionine | Meth |
| Vascular cylinder diameter (µm) | Vasr cylir dia | Lysine | Lys |
| Phloem thickness (µm) | Phl thick | ***Non-essential amino acid*** |  |
| Metaxylem vessel diameter (µm) | Metaxyl vesl dia | Serine | ser |
| *Leaf anatomy* |  | Glycine | Gly |
| Thickness of blade (µm) | blade Thick | Aspartic Acid | Asp Ad |
| Mesophyll thickness (µm) | Meso thick | Glutamic Acid | Glut Ad |
| Large vascular bundle – length (µm) | L vas bun – leng | Alanine | Ala |
| Large vascular bundle – width (µm) | Lar vas bun – width | Proline | Prol |
| Phloem thickness (µm) | Phlo thick | Cystine | Cyst |
| Metaxylem vessel diameter (µm) | Metaxy vessel dia | Tyrosine | Tyr |
|  |  | Arginine | Argi |
